# Supplementary material for: Facet-dependent electrical conductivity properties of GaN wafers
Source: Royal Society of Chemistry journal article supplement (doi:10.1039/d1tc04219j), 2021-01-01
Supplement: d1tc04219j1.pdf [file d1tc04219j1.pdf]

Electronic Supplementary Information

**Facet-Dependent Electrical Conductivity Properties of GaN Wafers**

Pei-Lun Hsieh,<sup>‡a</sup> Gautam Kumar,<sup>‡b</sup> Yen-Yu Wang,<sup>c</sup> Yu-Jung Lu,<sup>cd</sup> Lih-Juann Chen<sup>\*ae</sup>  
and Michael H. Huang<sup>\*be</sup>

<sup>a</sup>Department of Materials Science and Engineering, National Tsing Hua University,  
Hsinchu 30013, Taiwan. E-mail: ljchen@mx.nthu.edu.tw

<sup>b</sup>Department of Chemistry, National Tsing Hua University, Hsinchu 30013, Taiwan. E-  
mail: hyhuang@mx.nthu.edu.tw

<sup>c</sup>Department of Physics, National Taiwan University, Taipei 10617, Taiwan

<sup>d</sup>Research Center for Applied Sciences, Academia Sinica, Taipei 11529, Taiwan

<sup>e</sup>Frontier Research Center on Fundamental and Applied Sciences of Matters, National  
Tsing Hua University, Hsinchu 30013, Taiwan

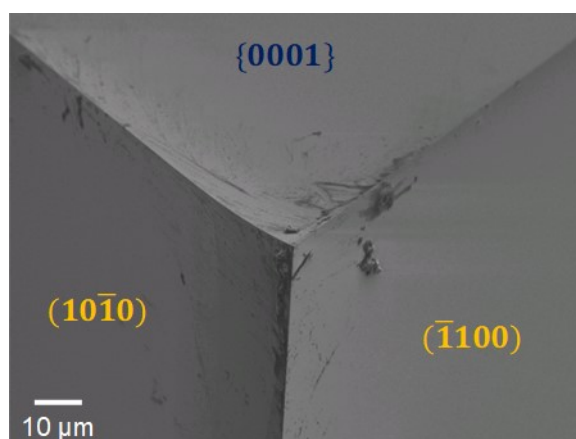

**Fig. S1** SEM image of a GaN wafer that was cut and broken to expose side facets.

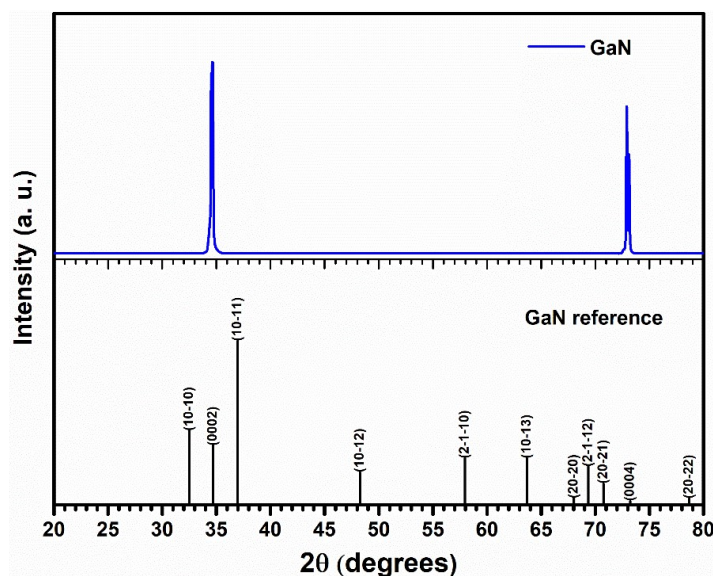

**Fig. S2** XRD pattern of a GaN wafer used for conductivity measurements.

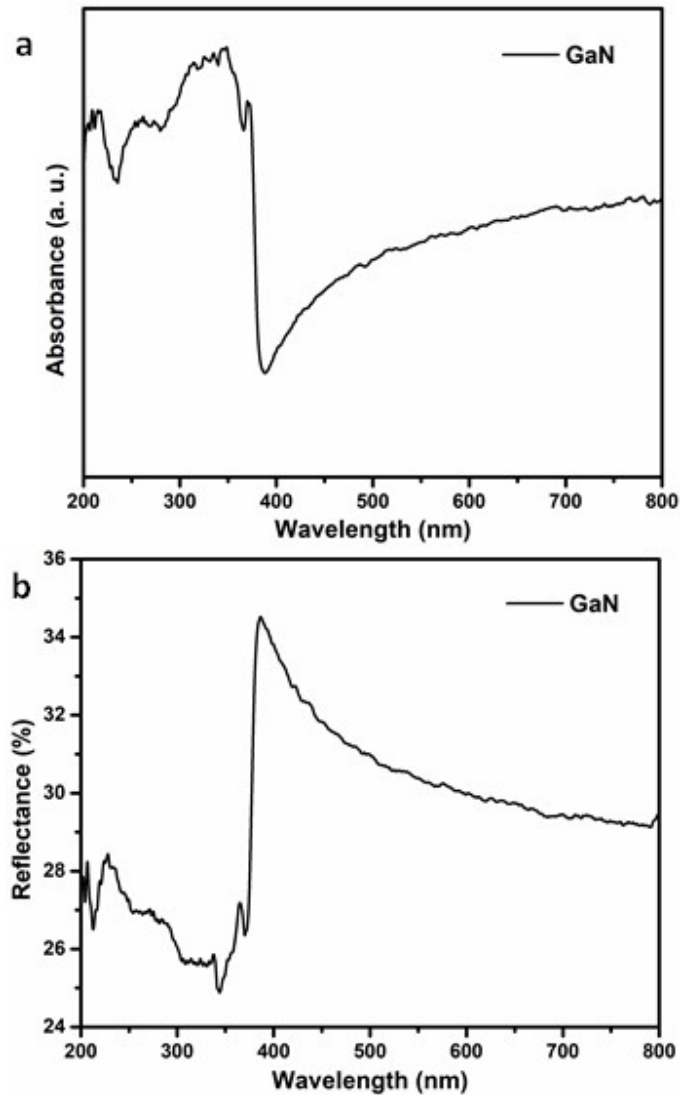

**Fig. S3** (a) UV-vis absorption spectrum and (b) diffuse reflectance spectrum of a GaN wafer. The continuous absorption from 400 to 800 nm should result from the solid sample holder with a black back-side support.

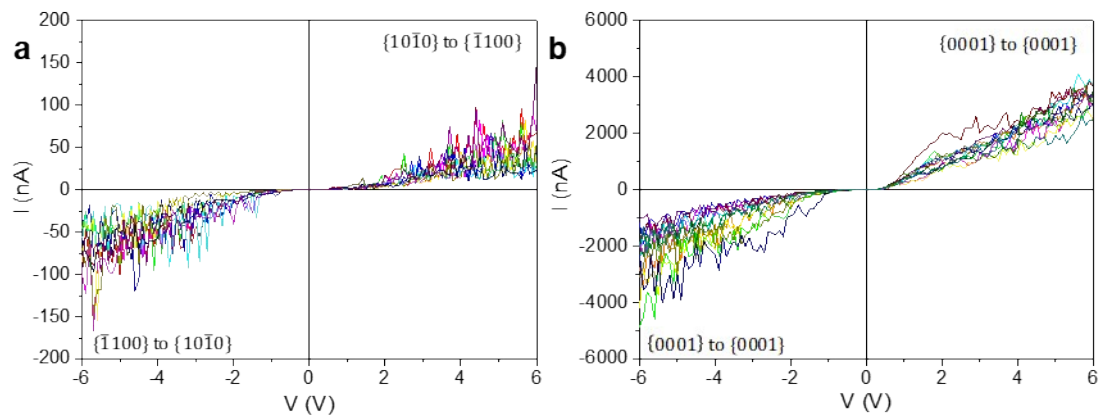

**Fig. S4** Multiple  $I$ - $V$  curves recorded with tungsten probes contacting (a)  $\{10\bar{1}0\}/\{\bar{1}100\}$  and (b)  $\{0001\}$  surfaces of an intrinsic GaN wafer.

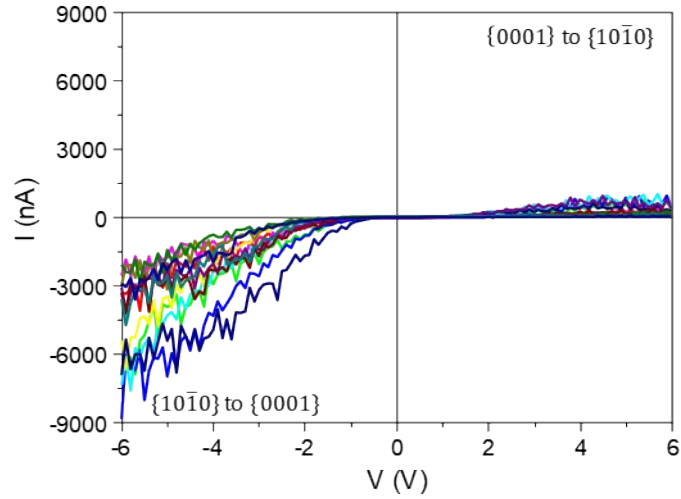

**Fig. S5** Multiple  $I$ - $V$  curves recorded with tungsten probes simultaneously contacting the  $\{10\bar{1}0\}$  and  $\{0001\}$  surfaces of an intrinsic GaN wafer.

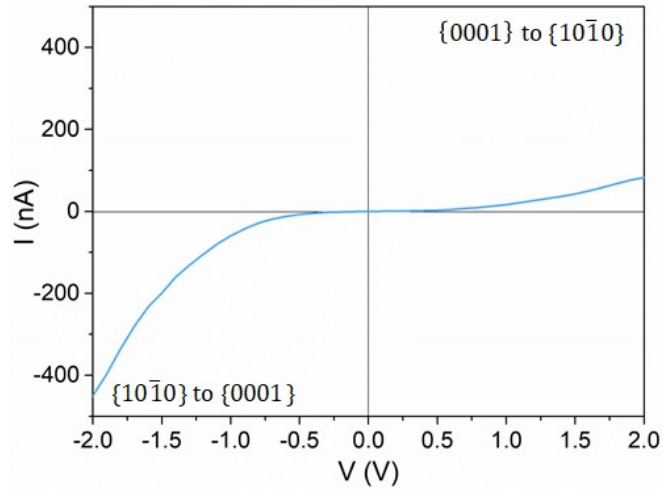

**Fig. S6** Expanded  $I$ - $V$  curve with tungsten probes contacting both  $\{10\bar{1}0\}$  and  $\{0001\}$  faces of a GaN wafer.
